# Supplementary material for: Geographically dispersed zoonotic tuberculosis in pre-contact South American human populations
Source: PubMed Central journal article supplement (PMC8901693; doi:10.1038/s41467-022-28562-8), 2022-03-07
Supplement: 41467_2022_28562_MOESM3_ESM.pdf [file 41467_2022_28562_MOESM3_ESM.pdf]

## Description of Additional Supplementary Files

File Name: Supplementary Data 1

Description: Overview of samples and corresponding qPCR and gene capture screening results.

File Name: Supplementary Data 2

Description: Overview of mapping statistics for UDG treated shotgun and non-UDG and UDG treated capture data to the MTBC\_anc reference.

File Name: Supplementary Data 3

Description: Taxon table generated in MEGAN6 based on the MALT Full Nucleotide database results from the UDG treated shotgun and capture data using an 85% identity filter and minimum support of 1.

File Name: Supplementary Data 4

Description: Values used to evaluate the level of MTBC reads in UDG-treated shotgun and capture data relative to non-target DNA.

File Name: Supplementary Data 5

Description: Taxon table generated in MEGAN6 based on the MALT Full Nucleotide database results from the non-UDG treated shotgun data using an 85% identity filter and minimum support of 1.

File Name: Supplementary Data 6

Description: Taxon table generated in MEGAN6 based on the MALT Full Nucleotide database results from the non-UDG treated shotgun data using an 95% identity filter and minimum support of 1.

File Name: Supplementary Data 7

Description: Comparative analysis of MALT results on non-UDG treated shotgun data for all six ancient samples.

File Name: Supplementary Data 8

Description: Taxon table generated in MEGAN6 based on the MALT Full Nucleotide database results for the captured extraction and library negative controls using 95% identity filter and minimum support of 1.

File Name: Supplementary Data 9

Description: Damage pattern mapping-test. Mapping statistics for filtered non-UDG reads mapped to the MTBC\_anc.

File Name: Supplementary Data 10

Description: Mapping statistics of non-UDG treated capture data to the human genome (hg19).

File Name: Supplementary Data 11

Description: Radiocarbon dates and stable isotope data generated as part of this study (Beta Analytic Inc.).

File Name: Supplementary Data 12

Description: Information about strains used in phylogenetic and SNP analyses.

File Name: Supplementary Data 13

Description: Overview of SNPs that occur in at least one of the ancient or modern *M. pinnipedii* genomes.

File Name: Supplementary Data 14

Description: Coordinates and number of reads supporting the deletion breakpoints for regions of difference.

File Name: Supplementary Data 15

Description: Sequences and optimized final concentrations of qPCR primers and probes used for MTBC screening assays.
